# Supplementary material
Source: PubMed Central journal article supplement (PMC4438443)
Supplement: supp_eru457_jexbot130633_file001.pdf [file supp_eru457_jexbot130633_file001.pdf]

**Supplemental Fig. S1.** Genetic transformation of *TaFAR5* in tomato cv MicroTom driven by the CaMV 35S promoter. (A) schematic representation of constructs used in the transformation experiments. LB, T-DNA left border; 35S polyA, CaMV 35S polyA; Hyg, Hygromycin resistance gene; Tnos, NOS terminator; RB, T-DNA right border. (B) PCR screening of transgenic T<sub>1</sub> generation plants by detecting the presence of hygromycin gene. Lane 1 to Lane 7 represent different transgenic T<sub>1</sub> generation plants; M, DNA ladder DL2000. (C) Plant architecture of T<sub>1</sub> transgenic lines at the flowering stage. CK is the empty pCXSN vector control.

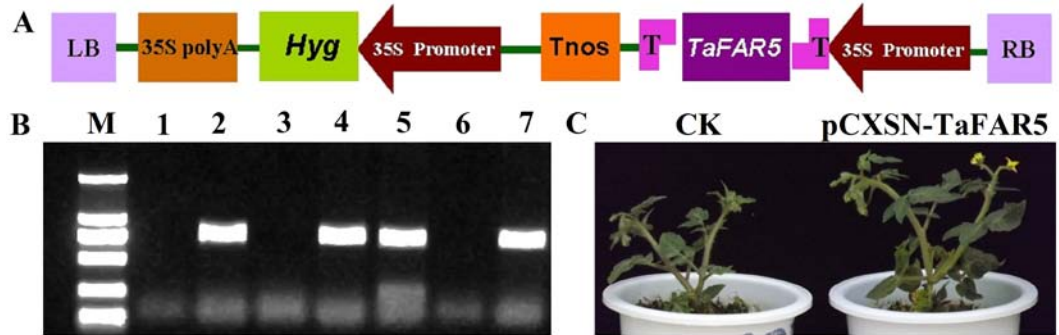

**Supplemental Fig. S2.** Cuticular wax crystal patterns on leaves of tomato detected by SEM. A and B, The adxial side of leaves in CK plants and transgenic T<sub>1</sub> lines, respectively. C and D, The abaxial side of leaves in CK plants and transgenic T<sub>1</sub> lines, respectively. CK is the empty pCXSN vector control. Scale bars = 1  $\mu$ m.

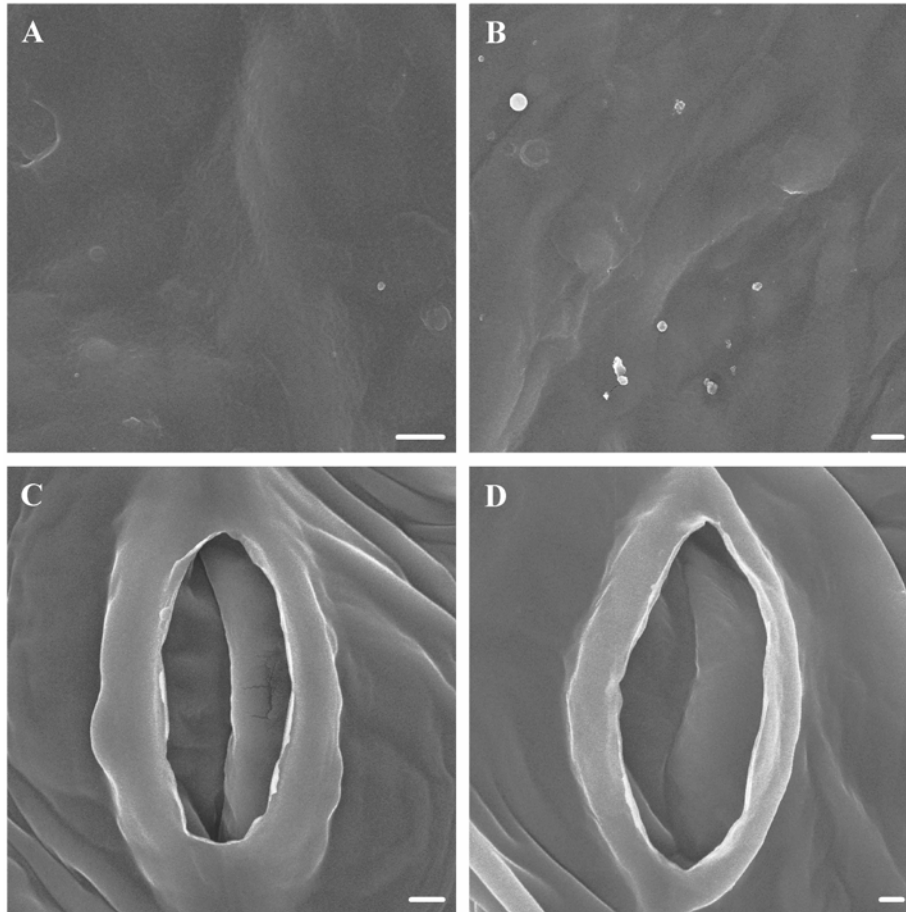

**Supplemental Table S1.** Sequence information of PCR primers for genomic PCR, qRT-PCR, yeast expression and subcellular localization.

| Primer name  | Sequence (5' to 3')                        |                                            | Description              |
|--------------|--------------------------------------------|--------------------------------------------|--------------------------|
|              | Forward primer sequence                    | Reverse primer sequence                    |                          |
| TaFAR5a      | CACCAACTTCTACGAAAGGTA                      | GTAATTTCAATGTACTTCATAGGAT                  | Chromosomal localization |
| TaFAR5b      | AAGGACCTCAGGAAGCAGA                        | GTAATTTCAATGTACTTCATAGGAT                  | Chromosomal localization |
| TaFAR5-CDS   | ATGGTGGGCACGCTGGATGAGG                     | TCACTTGTGGACGTACTTCATG                     | cDNA PCR                 |
| TaFAR5-JY1   | CGTGTTGCCGTTGCTAAT                         | ATGTCAAGCCTGGTATGG                         | Genomic PCR              |
| TaFAR5-JY2   | CGTCCGCCGAGTAGCAT                          | GAGGCAGTACAATCGAAGGAA                      | Genomic PCR              |
| HPT          | GATGTTGGCGACCTCGTATT                       | TCGTTATGTTTATCGGCACTTT                     | Transgenic screening     |
| qRT-TaFAR5-1 | CCTTGAACCTCCTCCGCCTGCTC                    | ACTTGCGGGCGAGGTCGTGGTA                     | Quantitative RT-PCR      |
| qRT-TaFAR5-2 | GGATCGAAGGCACCAGGACG                       | TCTGGCTCTGATGTCTGAGTGGA                    | Quantitative RT-PCR      |
| qRT-Actin1   | TGTTGTTCTCAGTGGAGGTTCT                     | CTGTATTTCTTTTCAGGTGGTG                     | Quantitative RT-PCR      |
| qRT-Actin2   | CTATCCTTCGTTTGGACCTT                       | AGCGAGCTTCTCCTTTATGT                       | Quantitative RT-PCR      |
| TaFAR5-PET28 | TCGCGGATCCGAATTCATGG<br>TGGGCACGCTGGATGAGG | GTGCGGCCGCAAGCTTTCACTT<br>GTGGACGTACTTCATG | <i>E.coli</i> yeast      |
| TaFAR5-YS    | AGGGAATATTAAGCTTATG<br>GTGGGCACGCTGGATGAGG | GATATCTGCAGAATTCTCACT<br>TGTGGACGTACTTCATG | Yeast expression         |
| TaFAR5-PA7   | ACGAACGATACTCGAGATG<br>GTGGGCACGCTGGATGAGG | GCTCACCATCACTAGTGCC<br>TTGTGGACGTACTTCATG  | Subcellular localization |
